# Generative Artificial Intelligence Model for Simulating Brain Structural Changes in Schizophrenia

1 **Hiroyuki Yamaguchi<sup>1,2</sup>, Genichi Sugihara<sup>3</sup>, Masaaki Simizu<sup>3</sup>, Yuichi Yamashita<sup>1\*</sup>**

2 <sup>1</sup>Department of Information Medicine, National Institute of Neuroscience, National Center of  
3 Neurology and Psychiatry, Kodaira, Tokyo, 187-8502, Japan

4 <sup>2</sup>Department of Psychiatry, Yokohama City University, School of Medicine, Yokohama, 236-0004,  
5 Japan

6 <sup>3</sup>Department of Psychiatry and Behavioral Sciences, Graduate School of Medical and Dental  
7 Sciences, Tokyo Medical and Dental University, Tokyo, 113-8510, Japan

8 **\*Correspondence:**

9 Yuichi Yamashita

10 [yamay@ncnp.go.jp](mailto:yamay@ncnp.go.jp)

11 **Keywords: Generative AI, Deep Learning, CycleGAN, Brain MRI Simulation, Schizophrenia,**  
12 **Disease Simulation.**

13

## 14 **Abstract**

15 Background: Recent advancements in generative artificial intelligence (AI) for image generation have  
16 presented significant opportunities for medical imaging, offering a promising avenue for generating  
17 realistic virtual medical images while ensuring patient privacy. The generation of a large number of  
18 virtual medical images through AI has the potential to augment training datasets for discriminative AI  
19 models, particularly in fields with limited data availability, such as neuroimaging. Current studies on  
20 generative AI in neuroimaging have mainly focused on disease discrimination; however, its potential  
21 for simulating complex phenomena in psychiatric disorders remains unknown. In this study, as  
22 examples of a simulation, we aimed to present a novel generative AI model that transforms magnetic  
23 resonance imaging (MRI) images of healthy individuals into images that resemble those of patients  
24 with schizophrenia (SZ) and explore its application.

25 Methods: We used anonymized public datasets from the Center for Biomedical Research Excellence  
26 (SZ, 71 patients; healthy subjects [HSs], 71 patients) and the Autism Brain Imaging Data Exchange  
27 (autism spectrum disorder [ASD], 79 subjects; HSs, 105 subjects). We developed a model to transform  
28 MRI images of HSs into MRI images of SZ using cycle generative adversarial networks. The efficacy  
29 of the transformation was evaluated using voxel-based morphometry to assess the differences in brain  
30 region volume and the accuracy of age prediction pre- and post-transformation. In addition, the model  
31 was examined for its applicability in simulating disease comorbidities and disease progression.

32 Results: The model successfully transformed HS images into SZ images and identified brain volume  
33 changes consistent with existing case-control studies. We also applied this model to ASD MRI images,  
34 where simulations comparing SZ with and without ASD backgrounds highlighted the differences in  
35 brain structures due to comorbidities. Furthermore, simulation of disease progression while preserving  
36 individual characteristics showcased the model's ability to reflect realistic disease trajectories.

37 Discussion: The findings suggest that our generative AI model can capture subtle changes in brain  
38 structures associated with SZ and offers a novel tool for visualizing brain alterations across various  
39 conditions. The potential of this model extends beyond clinical diagnoses to advancements in the  
40 simulation of disease mechanisms, which may ultimately contribute to the refinement of therapeutic  
41 strategies.

42

## 43 1 Introduction

44 Rapid advancements in image generative artificial intelligence (AI) have marked the beginning of  
45 new possibilities in various fields (1). Significant breakthroughs include the emergence of DALL-E  
46 (2) and stable diffusion (3), which have made the potential of AI for generating realistic and complex  
47 images widely known (4). This evolution has profound implications, particularly in the intricate  
48 landscape of medical imaging, where concerns regarding privacy, ethics, and legal constraints have  
49 historically constrained the sharing of patient data.

50 The utilization of generative AI models has demonstrated realistic and comprehensive potential for  
51 generating two-dimensional medical images, such as chest radiographs and fundus photography (5),  
52 and three-dimensional (3D) medical images, including magnetic resonance imaging (MRI) of the  
53 brain, chest, and knees (6). These studies have highlighted the potential of generative AI for  
54 synthesizing authentic medical images without compromising the confidentiality of sensitive patient  
55 information.

56 The limitation of available medical images, in contrast to the abundance of natural images,  
57 emphasizes the importance of generative AI, which facilitates the use of large amounts of labeled  
58 data in model training. In neuroimaging, the generative AI approach has been used to generate brain  
59 MRI (7), single-photon emission tomography (SPECT) (8), and positron emission tomography (PET)  
60 (9). Among these, generative AI is commonly used in medical imaging to improve the performance  
61 of models by generating a large number of images and using them as training data, that is, for data  
62 augmentation (10–12). It is difficult to increase the number of samples for MRI of actual psychiatric  
63 and neurological disorders. Hence, a strategy using generative deep learning techniques, such as  
64 generative adversarial networks (GANs), is used to enhance the learning process by expanding the  
65 sample size (11,13–15). Zhou et al. demonstrated that a GAN framework could be developed to  
66 generate brain MRI images to enhance performance and improve accuracy in classifying Alzheimer's  
67 disease and mild cognitive impairment (16). Zhao et al. introduced a functional network connectivity-  
68 based GAN to distinguish patients with schizophrenia (SZ) from healthy subjects (HSs) using  
69 functional MRI data (17). Generative AI has also demonstrated strength in neuroimaging (18)  
70 segmentation. Furthermore, it is imperative to investigate the efficacy of style transfers derived from  
71 generative AI. Style transfer involves applying the characteristics or style of one image to another  
72 while preserving the content of the latter. This technique holds promise for transforming easily  
73 obtainable images, such as computed tomography scans, into images exclusive to a limited number of  
74 facilities, such as MRI scans (19). In addition, the application of the style transfer technique is  
75 expected to effectively reduce bias in image quality caused by differences in imaging equipment and  
76 sites (20), which are unavoidably included in MRI images (21).

77 Existing neuroimaging research using generative AI has concentrated primarily on contributions to  
78 specific areas, such as disease diagnosis and lesion detection. However, the use of these techniques to  
79 simulate more complex clinical phenomena presents an interesting area for further exploration of the  
80 potential use of generative AI in neuroimaging research (22). Examples from external medicine  
81 include attempts to simulate automated automobile driving (23) and the design of novel proteins (24).

82 Previous studies provide an example of one such attempt to apply generative AI to psychiatric brain  
83 imaging research, as an example of an approach to the problem of comorbidity and heterogeneity in  
84 psychiatric disorders (25,26). Specifically, these studies have focused on the relationship between SZ  
85 and autism spectrum disorder (ASD). SZ and ASD are defined as distinct disorder groups based on  
86 diagnostic criteria but share some common features, such as difficulties in social interaction and

87 communication (27). Furthermore, common features in brain structures and genetic alterations have  
88 been noted (28,29). Owing to the complexity of their etiology, the relationship between these two  
89 disorders and their comorbid phenotypes remains to be elucidated. The ability of generative AI to  
90 simulate these conditions can shed light on the intricate relationship between these disorders and their  
91 overlapping phenotypes.

92 The first step in this study was to develop a generative AI that simulates brain volume changes  
93 caused by SZ, specifically a generative AI using CycleGAN. This enables the transformation of brain  
94 images from healthy individuals into images similar to those of patients diagnosed with SZ. We  
95 validated this artificial schizophrenic brain simulator by analyzing specific brain regions affected by  
96 transformation and comparing them with existing findings on SZ. Furthermore, we aimed to evaluate  
97 the feasibility of our “SZ brain generator” in simulations of the disease process of SZ and in  
98 simulation experiments of the comorbidity of ASD and SZ.

## 99 **2 Materials and Methods**

### 100 **2.1 Dataset description**

101 In this study, we used the Center for Biomedical Research Excellence (COBRE;  
102 [http://fcon\\_1000.projects.nitrc.org/indi/retro/cobre.html](http://fcon_1000.projects.nitrc.org/indi/retro/cobre.html)) dataset, which is anonymized and publicly  
103 available. All the subjects were diagnosed and screened using the Structured Clinical Interview for  
104 the Diagnostic and Statistical Manual of Mental Disorders, 4th edition Axis I Disorders (SCID  
105 (30)(31). Individuals with a history of head trauma, neurological illness, serious medical or surgical  
106 illness, or substance abuse were excluded. We selected 142 subjects from this database, including 71  
107 patients with SZ and 71 HSs.

108 We also used the Autism Brain Imaging Data Exchange (ABIDE;  
109 [http://fcon\\_1000.projects.nitrc.org/indi/abide/](http://fcon_1000.projects.nitrc.org/indi/abide/)) dataset, which is a multicenter project that focuses on  
110 ASD. It includes > 1000 ASD and typically developing (TD) subjects. The New York City  
111 University dataset was used in this study. Finally, we included 184 subjects from this dataset: 79  
112 subjects with ASD and 105 TD subjects.

113 The demographic and clinical characteristics of the COBRE and ABIDE datasets are presented in  
114 Supplementary Table 1.

115 This study was conducted in accordance with the current Ethical Guidelines for Medical and Health  
116 Research Involving Human Subjects in Japan and was approved by the Committee on Medical Ethics  
117 of the National Center of Neurology and Psychiatry.

### 118 **2.3 Data preprocessing**

119 MRI data were preprocessed using the Statistical Parametric Mapping software (SPM12, Wellcome  
120 Department of Cognitive Neurology, London, UK,  
121 <https://www.fil.ion.ucl.ac.uk/spm/software/spm12/>) with the Diffeomorphic Anatomical Registration  
122 Exponentiated Lie Algebra registration algorithm (32). The MR images were processed using field  
123 bias correction to correct for nonuniform fields and were then segmented into gray matter (GM),  
124 white matter, and cerebrospinal fluid sections using tissue probability maps based on the International  
125 Consortium of Brain Mapping template. Individual GM images were normalized to the Montreal  
126 Neurological Institute template with a  $1.5 \times 1.5 \times 1.5 \text{ mm}^3$  voxel size and modulated for GM  
127 volumes. All normalized GM images were smoothed with a Gaussian kernel of 8 mm full width at

128 half maximum. Consequently, the size of the input images for the proposed model was  $121 \times 145 \times$   
129 121 voxels.

### 130 2.3 Cycle generative adversarial networks

131 The CycleGAN algorithm, a generative AI method that has been actively used in recent years for  
132 style transformation, was used in this study (33). This algorithm simultaneously learns to generate  
133 Style B from Style A, and Style A from Style B using two style datasets. In addition, whether the  
134 image is real or fake is discriminated. This enables style transformations without the need for  
135 supervised data. The GAN learns to progressively generate high-resolution images through these  
136 competitive processes. Figure 1 shows the schematic workflow of the proposed method. In this study,  
137 we constructed a model to transform images by learning two styles: MRI of HS and MRI of SZ.  
138 Using the learned model, we transformed HS into SZ and investigated how the brain regions changed  
139 pre- and post-transformation.

140 Figure 1 shows the proposed CycleGAN architecture. A 3D brain image was input into the proposed  
141 model to contain more spatial information, and the background area was cropped as much as possible  
142 (the voxel sizes were 96, 120, and 104). In the learning phase, the training HS MRI was input to  
143 Generator 1 (HS to SZ) to generate an SZ MRI (called virtual SZ). This virtual SZ was input to  
144 Generator 2 (SZ to HS) to generate an HS MRI (called reconstructed HS). Similarly, the training SZ  
145 MRI data were fed to the two generators in reverse order to generate a virtual HS and a reconstructed  
146 SZ. Next, two discriminators were used to judge the reality of the virtual and reconstructed images.

147 The network of Generators 1 and 2 consisted of U-Net (34), which is an autoencoder with skip  
148 connections. In this study, we proposed a U-Net model consisting of six consecutive 3D  
149 convolutional blocks (three encoding blocks and three decoding blocks) with instance normalization  
150 and rectified linear unit (ReLU) activation. The encoding blocks consisted of two convolutional  
151 layers and one pooling layer. The decoding block consisted of three transposed convolutional layers.  
152 Additionally, six layers of ResBlock were added to the intermediate layer of U-Net, which was used  
153 in the Residual Network to learn the residual function between the inputs and outputs of the layers  
154 (35). This structure is often used in GANs (2,36,37). The discriminator consisted of five blocks,  
155 including a 3D convolution layer with instance normalization and leaky ReLU activation. The  
156 proposed CycleGAN loss function comprises two parts: adversarial and cycle consistency losses.  
157 Adversarial loss is designed to optimize the generator's ability to produce images that are  
158 indistinguishable from those belonging to the target domain by the discriminator. Generator  $G_I$   
159 transforms an image in domain  $X$  into domain  $Y$ , where  $D_Y$  represents the discriminator for domain  $Y$ :

$$160 \quad \mathcal{L}_{adv}(G_1, D_Y, X, Y) = \mathbb{E}_{y \sim p(y)}[\log D_Y(y)] + \mathbb{E}_{x \sim p(x)}[\log(1 - D_Y(G_1(x)))]$$

161 In addition, the same formulation applied to generator  $G_2$  transforming an image in domain  $Y$  into  
162 domain  $X$ , with  $D_X$  as the corresponding discriminator.

163 The cycle consistency loss ensures that the image is transformed back to its original domain and then  
164 back. This loss component is given by the following:

$$165 \quad \mathcal{L}_{cyc}(G_1, G_2) = \mathbb{E}_{x \sim P(x)}[\|G_2(G_1(x)) - x\|] + \mathbb{E}_{y \sim P(y)}[\|G_1(G_2(y)) - y\|]$$

166 The network structure was explored preliminarily based on previous experiments (38,39). The details  
167 of the architecture of our framework are shown in Supplementary Figure 1.

168 We conducted the experiments in Python 3.8 using PyTorch v.1.9.1 library (40). Our network was  
169 implemented on a workstation running a 64 Gigabytes NVIDIA Quadro RTX 8000 GPU.

## 170 **2.4 Verification of generated virtual schizophrenia brain**

171 In this study, we used a trained CycleGAN model to generate virtual SZ MRI images of HSs.  
172 Subsequently, we analyzed the different regions of volume pre- (original HSs) and post- (virtual SZ  
173 converted from HSs) transformations and verified whether the results were consistent with the brain  
174 changes due to SZ indicated in previous case-control neuroimaging studies.

175 For verification, we performed voxel-based morphometry (VBM) using SPM12 (41,42). VBM is a  
176 method for comparing brain GM volumes from segmented MRI images using statistical parametric  
177 mapping to identify and infer region-specific differences. Standard and optimized VBM techniques  
178 have been used to detect psychiatric and neurological disorders (43–48). Whole-brain voxel-wise t-  
179 tests were performed, and paired t-tests were specifically employed for pre- and post-transformation  
180 comparisons. To account for potential scaling differences between pre- and post-transformation brain  
181 images, global scaling was applied to normalize the overall image intensity of each image. Correction  
182 for multiple comparisons was conducted at a combined voxel level of  $P < 0.001$ .

183 To ensure the reproducibility of the generation, we additionally assessed any variations in the  
184 accuracy of age prediction between pre- and post-transformations. Owing to the ultrahigh  
185 dimensionality of the brain images, principal component analysis was performed for dimensionality  
186 reduction, retaining all 71 dimensions corresponding to our sample size. Subsequently, fivefold  
187 cross-validation and linear regression were used to derive age predictions. To compare the age values  
188 predicted from the brain images pre- and post-transformation, a t-test was applied. The significance  
189 level was set at  $P < 0.05$ .

## 190 **2.5 Brain alteration simulations using a schizophrenia brain generator**

191 Two experiments were conducted to verify whether the developed generator can simulate brain  
192 alterations. The first involved simulating the comorbidities of the disease (Figure 2A). We applied  
193 the SZ brain generator to an independent dataset called ABIDE. This approach enables the virtual  
194 generation of an image depicting individuals with both ASD and SZ. Comparative analyses were  
195 performed between TD individuals and those with ASD as the baseline, TD individuals with SZ (TD  
196 + SZ), individuals with ASD and SZ (ASD + SZ), and individuals with ASD and ASD + SZ. The  
197 method used VBM to examine the variations in brain regions.

198 In the second experiment, we simulated disease progression, as shown in Figure 2B. We repeatedly  
199 applied the trained generator to the images and compared the results with those of the original images  
200 to validate the changes. Our analysis aimed to ascertain the effectiveness of this method for  
201 simulating brain alterations associated with disease progression. To confirm that the original  
202 individual characteristics were retained after repeated transformations of brain images, age  
203 predictions were made using each transformed image. An analysis of variance (ANOVA) was used to  
204 confirm the absence of significant differences in these predictions. The significance level was set at  $P$   
205  $< 0.05$ .

## 206 **3 Results**

### 207 **3.1 Generation of virtual schizophrenia brain**

208 Following an adequate learning process, our model was able to generate brain MRI images  
209 qualitatively (Supplementary Figure 2). We performed VBM analysis pre- and post-transformation to  
210 confirm that the model generated from MRI of HSs to MRI of patients with SZ captured the  
211 characteristics of schizophrenic brain structures. VBM analysis confirmed the regions of volume  
212 reduction after transformation to an SZ-like state, including the bilateral superior temporal gyrus,  
213 right middle temporal gyrus, right hippocampus, and bilateral medial frontal to anterior cingulate  
214 gyrus (Figure 3). This result is consistent with the findings of previous case-control studies on SZ  
215 (49–54), indicating that this model can reproduce the brain volume changes caused by SZ.

216 In addition, age prediction was performed using brain images obtained pre- and post-transformation,  
217 and there was no significant difference in the predicted values ( $P = 0.598$ ). In addition to the t-test,  
218 the effect size was calculated using Cohen's  $d$ , which revealed a small effect ( $d = 0.089$ )  
219 (Supplementary Figure 3).

220 Using a generator model that transforms the MRI of HSs into the MRI characteristics of patients with  
221 SZ, this model was applied to MRI images, and the volume differences of brain regions pre- and  
222 post-transformation were examined. After applying SZ brain generator images, volume reduction was  
223 observed in the bilateral superior temporal gyrus, right middle temporal gyrus, right hippocampus,  
224 and bilateral medial frontal gyrus to the anterior cingulate gyrus.

### 225 **3.2 Simulation analysis of virtual schizophrenia with autism spectrum disorder brain**

226 We performed a simulation using a trained SZ MRI generator. We generated virtual MRI images of  
227 ASD with SZ (ASD + SZ) by transforming them from MRI images. In Figure 4A, the cold-colored  
228 areas represent regions where the volume was reduced when ASD was comorbid with SZ. We  
229 confirmed volume reduction, mainly in the bilateral temporal lobes and insular cortex.

230 Next, we performed a simulation to examine whether there were differences in brain structure  
231 between individuals diagnosed with SZ with and without background ASD. Virtual SZ MRI images  
232 were generated from ASD and TD MRI images using an SZ brain generator. Depicted in Figure 4B  
233 are regions where the cold regions show a volume reduction in the virtual SZ generated from the  
234 ASD (ASD + SZ) compared with the virtual SZ generated from the TD (TD + SZ). Volume reduction  
235 was observed bilaterally in the hippocampus. The warm regions showed volume increases in the  
236 ASD + SZ images. An increase in volume was observed in the left middle temporal gyrus.

### 237 **3.3 Simulation analysis of repetitive transformations**

238 We hypothesized that repeated transformations of brain images could potentially delineate the  
239 evolutionary trajectory of an ailment. Employing the VBM, an investigation was undertaken on both  
240 the original images and the  $n$ th iterated rendition ( $n = 1-5$ ). The results showed that the region of  
241 difference expanded with each repeated transformation. Although it was initially relatively localized,  
242 it progressively became widespread and centered on the temporal lobe during the fifth  
243 transformation.

244 To confirm that the original individual characteristics were retained after repeated transformations of  
245 the brain images, age predictions were conducted using each transformed image.

246 Fivefold cross-validation and linear regression were used to predict age from repeatedly transformed  
247 brain images. The differences in prediction accuracy were evaluated using ANOVA. The results

248 showed no significant differences in age prediction ( $P = 0.932$ ,  $\eta^2_p = 0.01$ ) (Supplementary Figure 4).  
249 This suggests that the original individual characteristics are preserved after multiple transformations.

#### 250 4 Discussion

251 In this study, we introduced generative AI capable of depicting structural differences in the brain  
252 resulting from psychiatric disorders. Specifically, we developed a generative AI to transform brain  
253 images into SZ images. Our results confirm the potential of the model for facilitating several  
254 simulation experiments related to psychiatric disorders.

255 Our model was qualitatively successful in transforming the MRI images of HSs into images  
256 resembling those of patients with SZ. Subsequent VBM analysis confirmed the alignment of the  
257 model with previously established SZ studies. Patients with SZ exhibit structural anomalies in the  
258 superior temporal gyrus, thalamus, and hippocampus compared with healthy individuals, a finding  
259 that corroborates our results (53–55). This study offers a compelling solution to the problem of  
260 insufficient neuroimaging data by effectively generating data that capture the characteristics of SZ-  
261 related brain changes (56).

262 Subsequent simulations using a trained SZ brain generator extended the investigation to individuals  
263 with both SZ and ASD. SZ and ASD are distinct disorders with unique clinical profiles and natural  
264 history. However, ASD carries a significantly higher risk, three–six times, of developing SZ than TD  
265 individuals (57,58). Recent studies have indicated a convergence between SZ and ASD. To  
266 investigate this intricate relationship, we conducted a virtual brain simulation and proposed a new  
267 hypothesis. This exploration revealed volume reduction patterns, primarily concentrated in the  
268 bilateral temporal lobes and insular cortex, which are characteristic of comorbidities. This  
269 observation suggests that the model captures distinct structural changes specific to this subgroup,  
270 thereby demonstrating its potential to unravel the complex interplay between different psychiatric  
271 conditions.

272 Further simulations were performed assuming a retrospective study. In this study, we generated brain  
273 images of patients with SZ with and without ASD and examined whether it was possible to analyze  
274 the differences in their structures. The distinct volume reductions observed in the bilateral  
275 hippocampus in the ASD + SZ group indicate a potential structural divergence associated with the  
276 comorbidity. Conversely, the volume increase in the left middle temporal gyrus in the same group  
277 offers an interesting avenue for understanding unique structural variations in this population. Zheng  
278 et al. reported that the higher the autistic traits, the lesser the improvement in psychiatric symptoms  
279 and life functioning after a year (59). Therefore, it is important to determine the presence or absence  
280 of ASD in the context of SZ to predict the prognosis and determine the course of treatment. The  
281 proposed model can provide decision support for treatment strategies.

282 The repeated transformation approach, which was designed to explore the evolutionary trajectory of  
283 brain changes, provides novel insights into ailment progression. The expansion of the difference  
284 region with each repeated transformation, culminating in a widespread pattern centered on the  
285 temporal lobe, underscores the model's ability to capture and magnify the cumulative effects of  
286 structural alterations. A meta-analysis of longitudinal studies on SZ revealed that patients with SZ  
287 exhibited significantly higher volume loss over time (49). This loss included the entire cortical GM,  
288 left superior temporal gyrus, left anterior temporal gyrus, and left Heschl's gyrus. These findings are  
289 consistent with the simulation results generated using the proposed model. This repeated approach



290 can potentially aid in elucidating the progressive nature of the impact of the disorder on the brain  
291 structure.

292 Investigation of the preservation of the original individual characteristics after repeated  
293 transformations brought an essential dimension to the study. By evaluating age predictions across the  
294 transformed images, this study established the robustness of the model in retaining individual-  
295 specific features. The absence of statistically significant differences in age predictions reinforces the  
296 credibility of repeated transformations in preserving the key characteristics of the original images.

297 Despite these promising findings, it is crucial to acknowledge the limitations of this study. One  
298 limitation is the reliance on a simulated data approach, which may not fully capture the complexity of  
299 real-world brain structural variations. Additionally, even if there is no difference in the accuracy of  
300 age prediction using the generated brain images, it may not cover the entire range of demographic  
301 factors that could influence brain structure. Further validation with larger and more diverse datasets  
302 and comparisons with other methodologies can enhance the generalizability of the results.

303 In conclusion, this study demonstrated the potential of the developed model to capture and simulate  
304 brain structural alterations associated with SZ and its comorbidity with ASD. These findings provide  
305 a foundation for exploring the mechanisms underlying these conditions and their interconnections.

## 306 **5 Conflict of Interest**

307 The authors declare that the research was conducted in the absence of any commercial or financial  
308 relationships that could be construed as a potential conflict of interest.

## 309 **6 Author Contributions**

310 HY and YY conceived and designed the study. HY conducted the deep learning experiments and  
311 analyzed the data. HY and YY drafted the manuscript. GS and MS provided the critical revisions. All  
312 the authors contributed to and approved the final version of the manuscript.

## 313 **7 Funding**

314 This work was partially supported by the JSPS KAKENHI (Grant Numbers JP 18K07597, JP  
315 20H00625, JP 22K15777, JP 22K07574, JST CREST JPMJCR21P4) and an Intramural Research  
316 Grant (4-6, 6-9) for Neurological and Psychiatric Disorders of the NCNP.

## 317 **8 Acknowledgments**

318 We thank all the authors of the included studies. We also would like to thank Editage  
319 ([www.editage.com](http://www.editage.com)) for English language editing.

## 320 **9 References**

- 321 1. Gong C, Jing C, Chen X, Pun CM, Huang G, Saha A, Nieuwoudt M, Li H-X, Hu Y, Wang S.  
322 Generative AI for brain image computing and brain network computing: a review. *Front*  
323 *Neurosci* (2023) 17:1203104. doi: 10.3389/fnins.2023.1203104
- 324 2. Ramesh A, Dhariwal P, Nichol A, Chu C, Chen M. Hierarchical Text-Conditional Image  
325 Generation with CLIP Latents. (2022) <http://arxiv.org/abs/2204.06125>

- 326 3. Rombach R, Blattmann A, Lorenz D, Esser P, Ommer B. High-Resolution Image Synthesis  
327 with Latent Diffusion Models. *2022 IEEE/CVF Conference on Computer Vision and Pattern  
328 Recognition (CVPR)*. IEEE (2022). p. 10674–10685 doi: 10.1109/CVPR52688.2022.01042
- 329 4. Xiao J, Bi X. Model-Guided Generative Adversarial Networks for Unsupervised Fine-Grained  
330 Image Generation. *IEEE Trans Multimed* (2024) 26:1188–1199. doi:  
331 10.1109/TMM.2023.3277758
- 332 5. Müller-Franzes G, Niehues JM, Khader F, Arasteh ST, Haarbürger C, Kuhl C, Wang T, Han  
333 T, Nebelung S, Kather JN, et al. Diffusion Probabilistic Models beat GANs on Medical  
334 Images. (2022) <http://arxiv.org/abs/2212.07501>
- 335 6. Khader F, Müller-Franzes G, Tayebi Arasteh S, Han T, Haarbürger C, Schulze-Hagen M,  
336 Schad P, Engelhardt S, Baeßler B, Foersch S, et al. Denoising diffusion probabilistic models  
337 for 3D medical image generation. *Sci Rep* (2023) 13:7303. doi: 10.1038/s41598-023-34341-2
- 338 7. Kwon G, Han C, Kim D. Generation of 3D Brain MRI Using Auto-Encoding Generative  
339 Adversarial Networks. (2019) 1:118–126. doi: 10.1007/978-3-030-32248-9\_14
- 340 8. Werner RA, Higuchi T, Nose N, Toriumi F, Matsusaka Y, Kuji I, Kazuhiro K. Generative  
341 adversarial network-created brain SPECTs of cerebral ischemia are indistinguishable to scans  
342 from real patients. *Sci Rep* (2022) 12:18787. doi: 10.1038/s41598-022-23325-3
- 343 9. Islam J, Zhang Y. GAN-based synthetic brain PET image generation. *Brain Informatics*  
344 (2020) 7:3. doi: 10.1186/s40708-020-00104-2
- 345 10. Choi J, Chae H. methCancer-gen: a DNA methylome dataset generator for user-specified  
346 cancer type based on conditional variational autoencoder. *BMC Bioinformatics* (2020) 21:181.  
347 doi: 10.1186/s12859-020-3516-8
- 348 11. Shorten C, Khoshgoftaar TM. A survey on Image Data Augmentation for Deep Learning. *J*  
349 *Big Data* (2019) 6: doi: 10.1186/s40537-019-0197-0
- 350 12. Kumar S. CycleGAN-based Data Augmentation to Improve Generalizability Alzheimer ' s  
351 Diagnosis using Deep Learning. (2024)1–13. doi: 10.21203/rs.3.rs-4141650/v1
- 352 13. Shin H-C, Tenenholtz NA, Rogers JK, Schwarz CG, Senjem ML, Gunter JL, Andriole KP,  
353 Michalski M. “Medical Image Synthesis for Data Augmentation and Anonymization Using  
354 Generative Adversarial Networks.” In: Gooya A, Goksel O, Oguz I, Burgos N, editors.  
355 *Lecture Notes in Computer Science (including subseries Lecture Notes in Artificial  
356 Intelligence and Lecture Notes in Bioinformatics)*. Lecture Notes in Computer Science. Cham:  
357 Springer International Publishing (2018). p. 1–11 doi: 10.1007/978-3-030-00536-8\_1
- 358 14. Goodfellow IJ, Pouget-Abadie J, Mirza M, Xu B, Warde-Farley D, Ozair S, Courville A,  
359 Bengio Y. Generative Adversarial Networks. (2014) 63:139–144.  
360 <http://arxiv.org/abs/1406.2661>
- 361 15. Zhang Y, Wang Q, Hu B. MinimalGAN: diverse medical image synthesis for data  
362 augmentation using minimal training data. *Appl Intell* (2023) 53:3899–3916. doi:  
363 10.1007/s10489-022-03609-x

- 364 16. Zhou X, Qiu S, Joshi PS, Xue C, Killiany RJ, Mian AZ, Chin SP, Au R, Kolachalama VB.  
365 Enhancing magnetic resonance imaging-driven Alzheimer's disease classification performance  
366 using generative adversarial learning. *Alzheimers Res Ther* (2021) 13:60. doi: 10.1186/s13195-  
367 021-00797-5
- 368 17. Zhao J, Huang J, Zhi D, Yan W, Ma X, Yang X, Li X, Ke Q, Jiang T, Calhoun VD, et al.  
369 Functional network connectivity (FNC)-based generative adversarial network (GAN) and its  
370 applications in classification of mental disorders. *J Neurosci Methods* (2020) 341:108756. doi:  
371 10.1016/j.jneumeth.2020.108756
- 372 18. Chen X, Peng Y, Li D, Sun J. DMCA-GAN: Dual Multilevel Constrained Attention GAN for  
373 MRI-Based Hippocampus Segmentation. *J Digit Imaging* (2023) 36:2532–2553. doi:  
374 10.1007/s10278-023-00854-5
- 375 19. Li W, Li Y, Qin W, Liang X, Xu J, Xiong J, Xie Y. Magnetic resonance image (MRI)  
376 synthesis from brain computed tomography (CT) images based on deep learning methods for  
377 magnetic resonance (MR)-guided radiotherapy. *Quant Imaging Med Surg* (2020) 10:1223–  
378 1236. doi: 10.21037/QIMS-19-885
- 379 20. Cackowski S, Barbier EL, Dojat M, Christen T. comBat versus cycleGAN for multi-center  
380 MR images harmonization. (2021). 1–11 p.
- 381 21. Fortin J-P, Cullen N, Sheline YI, Taylor WD, Aselcioglu I, Cook PA, Adams P, Cooper C,  
382 Fava M, McGrath PJ, et al. Harmonization of cortical thickness measurements across scanners  
383 and sites. *Neuroimage* (2018) 167:104–120. doi: 10.1016/j.neuroimage.2017.11.024
- 384 22. Wang H, Fu T, Du Y, Gao W, Huang K, Liu Z, Chandak P, Liu S, Van Katwyk P, Deac A, et  
385 al. Scientific discovery in the age of artificial intelligence. *Nature* (2023) 620:47–60. doi:  
386 10.1038/s41586-023-06221-2
- 387 23. Xu M, Niyato D, Chen J, Zhang H, Kang J, Xiong Z, Mao S, Han Z. Generative AI-  
388 empowered Simulation for Autonomous Driving in Vehicular Mixed Reality Metaverses.  
389 *IEEE J Sel Top Signal Process* (2023)1–15. doi: 10.1109/JSTSP.2023.3293650
- 390 24. Anishchenko I, Pellock SJ, Chidyausiku TM, Ramelot TA, Ovchinnikov S, Hao J, Bafna K,  
391 Norn C, Kang A, Bera AK, et al. De novo protein design by deep network hallucination.  
392 *Nature* (2021) 600:547–552. doi: 10.1038/s41586-021-04184-w
- 393 25. Feczko E, Miranda-Dominguez O, Marr M, Graham AM, Nigg JT, Fair DA. The  
394 Heterogeneity Problem: Approaches to Identify Psychiatric Subtypes. *Trends Cogn Sci* (2019)  
395 23:584–601. doi: 10.1016/j.tics.2019.03.009
- 396 26. Owen MJ. New approaches to psychiatric diagnostic classification. *Neuron* (2014) 84:564–  
397 571. doi: 10.1016/j.neuron.2014.10.028
- 398 27. Shi L, Zhou H, Wang Y, Shen Y, Fang Y, He Y, Ou J, Li H, Luo X, Cheung EFC, et al.  
399 Altered empathy-related resting-state functional connectivity in adolescents with early-onset  
400 schizophrenia and autism spectrum disorders. *Asian J Psychiatr* (2020) 53:102167. doi:  
401 10.1016/j.ajp.2020.102167

- 402 28. Anttila V, Bulik-Sullivan B, Finucane HK, Walters RK, Bras J, Duncan L, Escott-Price V,  
403 Falcone GJ, Gormley P, Malik R, et al. Analysis of shared heritability in common disorders of  
404 the brain. *Science* (80-) (2018) 360:eaap8757. doi: 10.1126/science.aap8757
- 405 29. Opel N, Goltermann J, Hermesdorf M, Berger K, Baune BT, Dannlowski U. Cross-Disorder  
406 Analysis of Brain Structural Abnormalities in Six Major Psychiatric Disorders: A Secondary  
407 Analysis of Mega- and Meta-analytical Findings From the ENIGMA Consortium. *Biol*  
408 *Psychiatry* (2020) 88:678–686. doi: 10.1016/j.biopsych.2020.04.027
- 409 30. Fisher G, Roget N. Diagnostic and Statistical Manual of Mental Disorders. *Encycl Subst Abus*  
410 *Prev Treat Recover* (2014) doi: 10.4135/9781412964500.n104
- 411 31. First MB, Spitzer RL, Gibbon M, Williams JBW. *Structured clinical interview for DSM-IV*  
412 *Axis I Disorders SCID-I*. Washington, DC: American Psychiatric Publishing. (1997).  
413 [https://books.google.co.jp/books?id=h5\\_lwAEACAAJ](https://books.google.co.jp/books?id=h5_lwAEACAAJ)
- 414 32. Ashburner J. A fast diffeomorphic image registration algorithm. *Neuroimage* (2007) 38:95–  
415 113. doi: 10.1016/j.neuroimage.2007.07.007
- 416 33. Zhu J-Y, Park T, Isola P, Efros AA. Unpaired Image-to-Image Translation Using Cycle-  
417 Consistent Adversarial Networks. *2017 IEEE International Conference on Computer Vision*  
418 *(ICCV)*. IEEE (2017). p. 2242–2251 doi: 10.1109/ICCV.2017.244
- 419 34. Ronneberger O, Fischer P, Brox T. U-net: Convolutional networks for biomedical image  
420 segmentation. *Lect Notes Comput Sci (including Subser Lect Notes Artif Intell Lect Notes*  
421 *Bioinformatics)* (2015) 9351:234–241. doi: 10.1007/978-3-319-24574-4\_28
- 422 35. He K, Zhang X, Ren S, Sun J. Deep residual learning for image recognition. *Proceedings of*  
423 *the IEEE Computer Society Conference on Computer Vision and Pattern Recognition*. (2016).  
424 p. 770–778 doi: 10.1109/CVPR.2016.90
- 425 36. Xu W, Long C, Wang R, Wang G. DRB-GAN: A Dynamic ResBlock Generative Adversarial  
426 Network for Artistic Style Transfer. (2022)6363–6372. doi: 10.1109/iccv48922.2021.00632
- 427 37. Deng H, Wu Q, Huang H, Yang X, Wang Z. InvolutionGAN: lightweight GAN with  
428 involution for unsupervised image-to-image translation. *Neural Comput Appl* (2023)  
429 35:16593–16605. doi: 10.1007/s00521-023-08530-z
- 430 38. Yamaguchi H, Hashimoto Y, Sugihara G, Miyata J, Murai T, Takahashi H, Honda M,  
431 Hishimoto A, Yamashita Y. Three-Dimensional Convolutional Autoencoder Extracts Features  
432 of Structural Brain Images With a “Diagnostic Label-Free” Approach: Application to  
433 Schizophrenia Datasets. *Front Neurosci* (2021) 15:652987. doi: 10.3389/fnins.2021.652987
- 434 39. Hashimoto Y, Ogata Y, Honda M, Yamashita Y. Deep Feature Extraction for Resting-State  
435 Functional MRI by Self-Supervised Learning and Application to Schizophrenia Diagnosis.  
436 *Front Neurosci* (2021) 15:696853. doi: 10.3389/fnins.2021.696853
- 437 40. Paszke A, Gross S, Massa F, Lerer A, Bradbury J, Chanan G, Killeen T, Lin Z, Gimelshein N,  
438 Antiga L, et al. PyTorch: An Imperative Style, High-Performance Deep Learning Library. *Adv*  
439 *Neural Inf Process Syst* (2019) 32: <http://arxiv.org/abs/1912.01703>

- 440 41. Ashburner J, Friston KJ. Voxel-based morphometry - The methods. *Neuroimage* (2000)  
441 11:805–821. doi: 10.1006/nimg.2000.0582
- 442 42. Good CD, Johnsrude IS, Ashburner J, Henson RNA, Friston KJ, Frackowiak RSJ. A voxel-  
443 based morphometric study of ageing in 465 normal adult human brains. *Neuroimage* (2001)  
444 14:21–36. doi: 10.1006/nimg.2001.0786
- 445 43. Falcon C, Tucholka A, Monté-Rubio GC, Cacciaglia R, Operto G, Rami L, Gispert JD,  
446 Molinuevo JL. Longitudinal structural cerebral changes related to core CSF biomarkers in  
447 preclinical Alzheimer’s disease: A study of two independent datasets. *NeuroImage Clin* (2018)  
448 19:190–201. doi: 10.1016/j.nicl.2018.04.016
- 449 44. Chételat G, Landeau B, Eustache F, Mézenge F, Viader F, De La Sayette V, Desgranges B,  
450 Baron JC. Using voxel-based morphometry to map the structural changes associated with  
451 rapid conversion in MCI: A longitudinal MRI study. *Neuroimage* (2005) 27:934–946. doi:  
452 10.1016/j.neuroimage.2005.05.015
- 453 45. Kim GW, Kim YH, Jeong GW. Whole brain volume changes and its correlation with clinical  
454 symptom severity in patients with schizophrenia: A DARTEL-based VBM study. *PLoS One*  
455 (2017) 12:e0177251. doi: 10.1371/journal.pone.0177251
- 456 46. Schnack HG, van Haren NEM, Brouwer RM, van Baal GCM, Picchioni M, Weisbrod M,  
457 Sauer H, Cannon TD, Huttunen M, Lepage C, et al. Mapping reliability in multicenter MRI:  
458 Voxel-based morphometry and cortical thickness. *Hum Brain Mapp* (2010) 31:1967–1982.  
459 doi: 10.1002/hbm.20991
- 460 47. García-Martí G, Aguilar EJ, Lull JJ, Martí-Bonmatí L, Escartí MJ, Manjón J V., Moratal D,  
461 Robles M, Sanjuán J. Schizophrenia with auditory hallucinations: A voxel-based morphometry  
462 study. *Prog Neuro-Psychopharmacology Biol Psychiatry* (2008) 32:72–80. doi:  
463 10.1016/j.pnpbp.2007.07.014
- 464 48. Zhang T, Koutsouleris N, Meisenzahl E, Davatzikos C. Heterogeneity of structural brain  
465 changes in subtypes of schizophrenia revealed using magnetic resonance imaging pattern  
466 analysis. *Schizophr Bull* (2015) 41:74–84. doi: 10.1093/schbul/sbu136
- 467 49. Vita A, De Peri L, Deste G, Sacchetti E. Progressive loss of cortical gray matter in  
468 schizophrenia: a meta-analysis and meta-regression of longitudinal MRI studies. *Transl*  
469 *Psychiatry* (2012) 2:e190–e190. doi: 10.1038/tp.2012.116
- 470 50. Walton E, Hibar DP, van Erp TGM, Potkin SG, Roiz-Santiañez R, Crespo-Facorro B, Suarez-  
471 Pinilla P, Van Haren NEM, de Zwarte SMC, Kahn RS, et al. Positive symptoms associate with  
472 cortical thinning in the superior temporal gyrus via the ENIGMA Schizophrenia consortium.  
473 *Acta Psychiatr Scand* (2017) 135:439–447. doi: 10.1111/acps.12718
- 474 51. Modinos G, Costafreda SG, van Tol M-J, McGuire PK, Aleman A, Allen P. Neuroanatomy of  
475 auditory verbal hallucinations in schizophrenia: A quantitative meta-analysis of voxel-based  
476 morphometry studies. *Cortex* (2013) 49:1046–1055. doi: 10.1016/j.cortex.2012.01.009

- 477 52. Fan F, Xiang H, Tan S, Yang F, Fan H, Guo H, Kochunov P, Wang Z, Hong LE, Tan Y.  
478 Subcortical structures and cognitive dysfunction in first episode schizophrenia. *Psychiatry Res*  
479 *- Neuroimaging* (2019) 286:69–75. doi: 10.1016/j.psychresns.2019.01.003
- 480 53. van Erp TGM, Walton E, Hibar DP, Schmaal L, Jiang W, Glahn DC, Pearlson GD, Yao N,  
481 Fukunaga M, Hashimoto R, et al. Cortical Brain Abnormalities in 4474 Individuals With  
482 Schizophrenia and 5098 Control Subjects via the Enhancing Neuro Imaging Genetics Through  
483 Meta Analysis (ENIGMA) Consortium. *Biol Psychiatry* (2018) 84:644–654. doi:  
484 10.1016/j.biopsych.2018.04.023
- 485 54. Van Erp TGM, Hibar DP, Rasmussen JM, Glahn DC, Pearlson GD, Andreassen OA, Agartz I,  
486 Westlye LT, Haukvik UK, Dale AM, et al. Subcortical brain volume abnormalities in 2028  
487 individuals with schizophrenia and 2540 healthy controls via the ENIGMA consortium. *Mol*  
488 *Psychiatry* (2016) 21:547–553. doi: 10.1038/mp.2015.63
- 489 55. Honea R, Crow TJ, Passingham D, Mackay CE. Regional Deficits in Brain Volume in  
490 Schizophrenia: A Meta-Analysis of Voxel-Based Morphometry Studies. *Am J Psychiatry*  
491 (2005) 162:2233–2245. doi: 10.1176/appi.ajp.162.12.2233
- 492 56. Yamashita A, Yahata N, Itahashi T, Lisi G, Yamada T, Ichikawa N, Takamura M, Yoshihara  
493 Y, Kunimatsu A, Okada N, et al. Harmonization of resting-state functional MRI data across  
494 multiple imaging sites via the separation of site differences into sampling bias and  
495 measurement bias. *PLOS Biol* (2019) 17:e3000042. doi: 10.1371/journal.pbio.3000042
- 496 57. Jutla A, Foss-Feig J, Veenstra-VanderWeele J. Autism spectrum disorder and schizophrenia:  
497 An updated conceptual review. *Autism Res* (2022) 15:384–412. doi: 10.1002/aur.2659
- 498 58. Chien Y, Wu C, Tsai H. The Comorbidity of Schizophrenia Spectrum and Mood Disorders in  
499 Autism Spectrum Disorder. *Autism Res* (2021) 14:571–581. doi: 10.1002/aur.2451
- 500 59. Zheng S, Chua YC, Tang C, Tan GMY, Abdin E, Lim VWQ, Koh AS, Verma S, Magiati I.  
501 Autistic traits in first-episode psychosis: Rates and association with 1-year recovery outcomes.  
502 *Early Interv Psychiatry* (2021) 15:849–855. doi: 10.1111/eip.13021

503

## 504 **10 Data Availability Statement**

505 All data generated or analyzed in this study are included in the published article. Primary data were  
506 obtained from public databases, including the Center for Biomedical Research Excellence (COBRE;  
507 [http://fcon\\_1000.projects.nitrc.org/indi/retro/cobre.html](http://fcon_1000.projects.nitrc.org/indi/retro/cobre.html)) and Autism Brain Imaging Data Exchange  
508 (ABIDE; [http://fcon\\_1000.projects.nitrc.org/indi/abide/](http://fcon_1000.projects.nitrc.org/indi/abide/)).

509

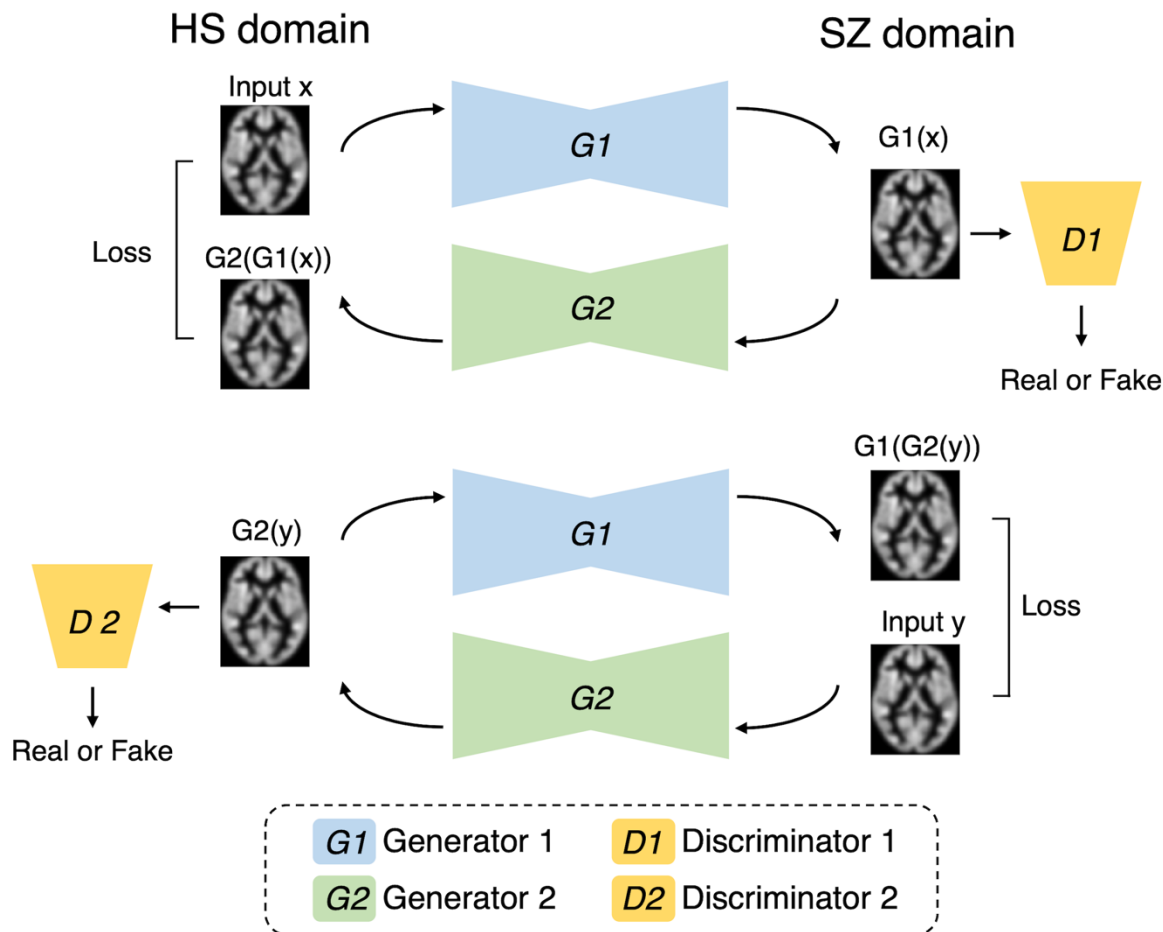

510

511 Figure 1: Our cycle generative adversarial network

512 The model is designed to enable the transformation between domains of healthy subjects (HSs) and  
513 patients with schizophrenia (SZ). Generator 1 ( $G1$ ) is responsible for transforming HS into SZ,  
514 whereas Generator 2 ( $G2$ ) performs the conversion from SZ back to HS. Discriminator 1 ( $D1$ )  
515 discriminates between real SZ images and virtually generated SZ-like images. Similarly,  
516 Discriminator 2 ( $D2$ ) discriminates between real HS images and synthetic HS-like images. The loss  
517 function is configured to optimize each component.

518

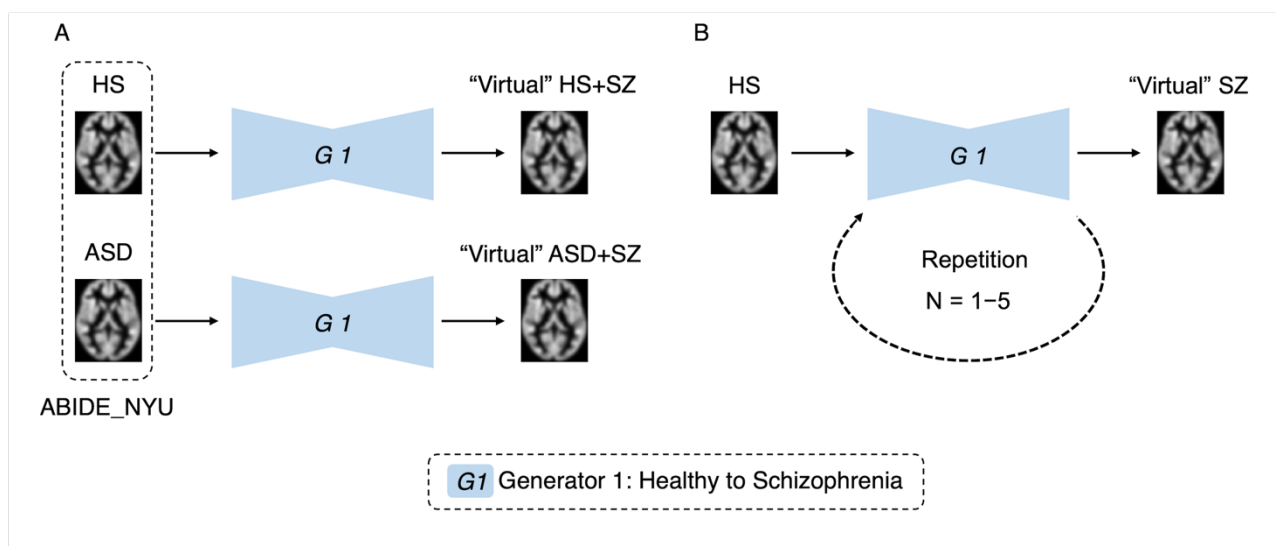

519  
520

Figure 2: Simulation experiments by generative brain images

521 Figure A is an experiment simulating disease comorbidity. The autism spectrum disorder and  
522 typically developing data were used to generate virtual images with a schizophrenia transducer.  
523 Figure B is an experiment simulating disease progression. Images were generated using one to five  
524 repetitions of the schizophrenia brain generator.

525



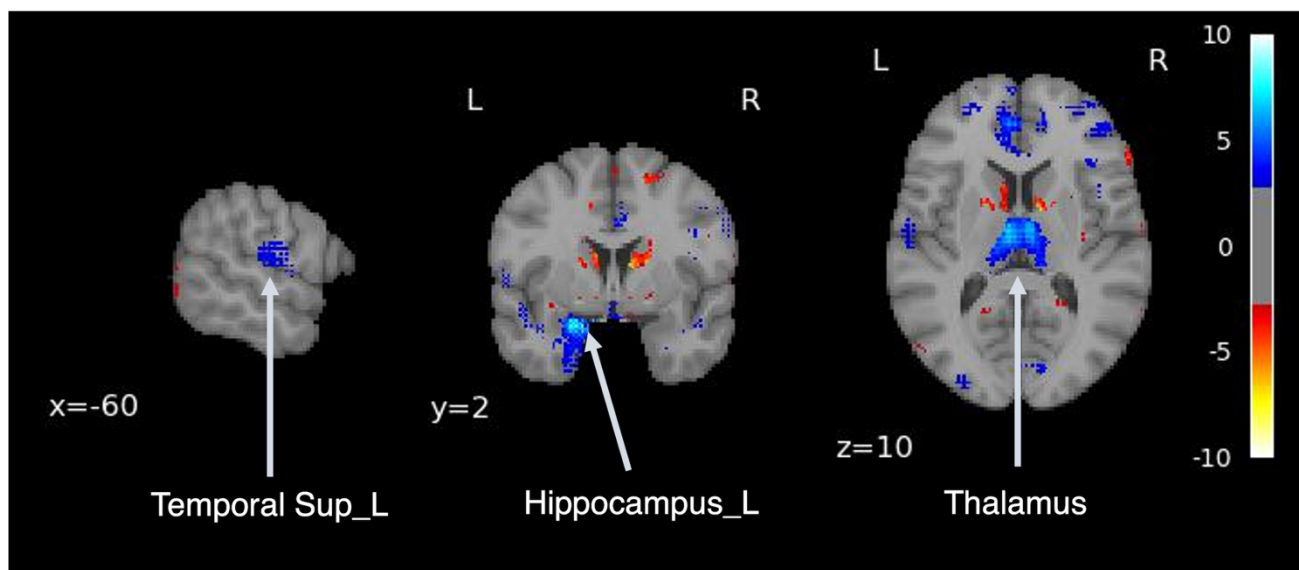

526  
527 Figure 3: Difference in brain volume pre- and post-transformation

528 Voxel-based morphometry analysis was performed between pre- and post-transformation magnetic  
529 resonance imaging images from healthy subjects and those with schizophrenia. Cold colors represent  
530 a decrease, and warm colors represent an increase. Temporal Sup\_L, left superior temporal gyrus;  
531 SupraMarginal\_L, left supramarginal gyrus.

532

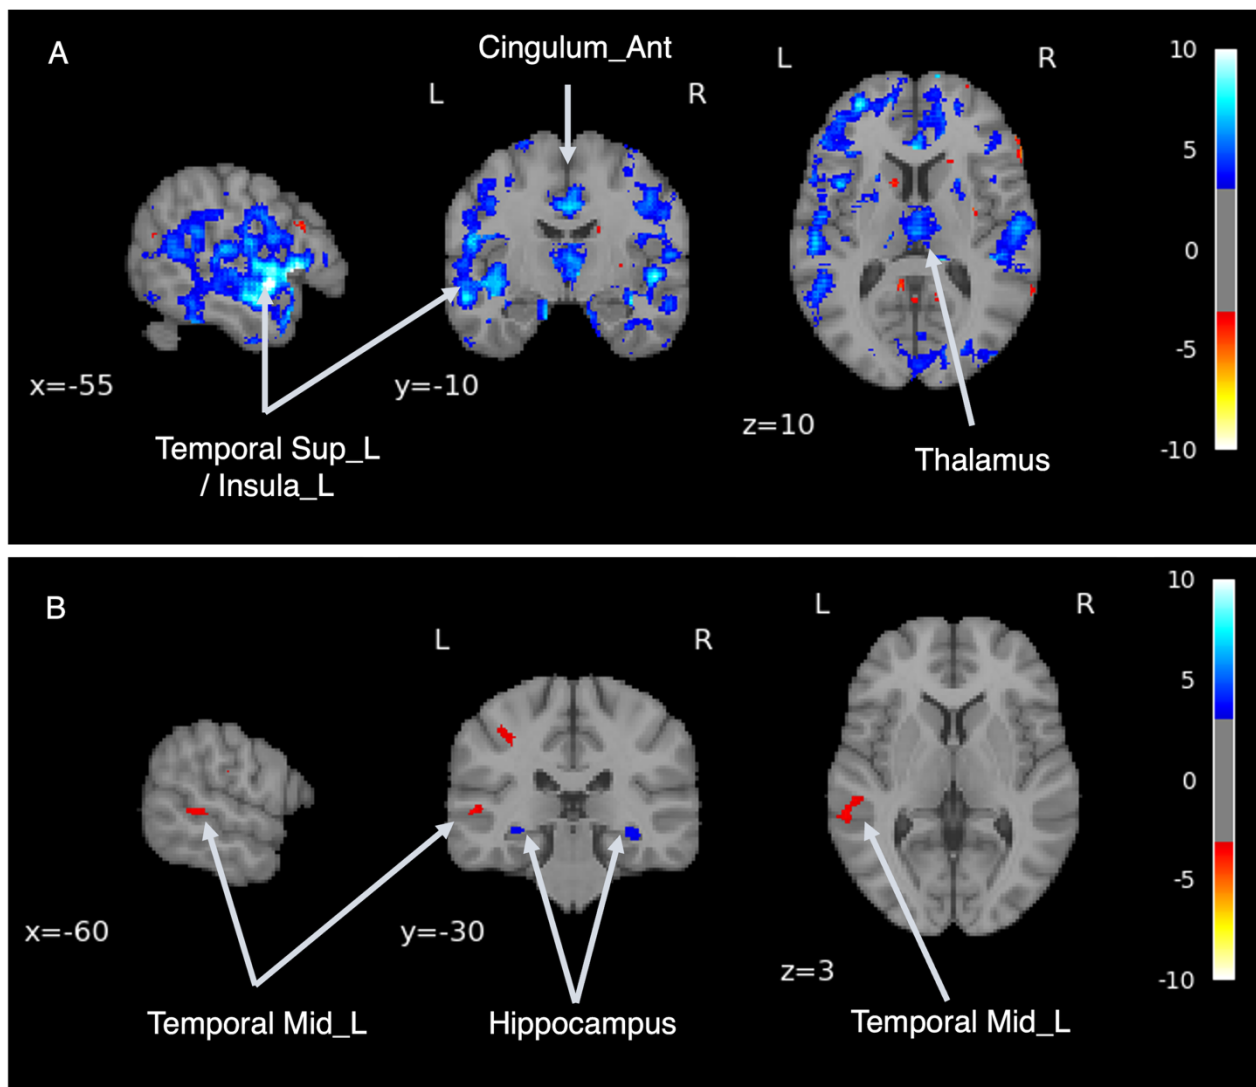

533  
534 Figure 4: Disease comorbidity simulation

535 Figure A shows the volume differences before and after the application of the schizophrenia brain  
536 generator, which enabled the generation of an image of autism spectrum disorder (ASD) combined  
537 with schizophrenia (SZ). Figure B shows the volume differences between the virtual SZ-like images  
538 with and without ASD.

539

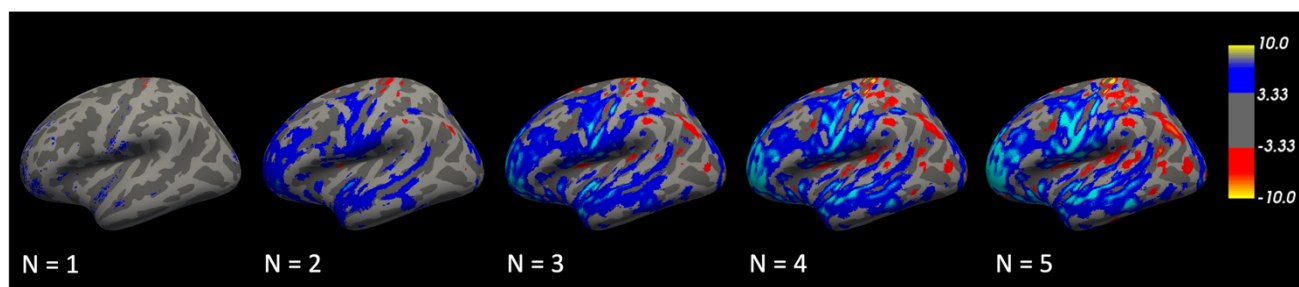

540  
541

Figure 5: Repetitive transformations

542 The volume differences were relatively localized at first, but gradually became more extensive,  
543 especially in the temporal lobe, by the fifth transformation.

544

545

---

| Characteristic       | COBRE (n = 142) |              | ABIDE_NYU (n = 184) |                  |
|----------------------|-----------------|--------------|---------------------|------------------|
|                      | SZ<br>n=71      | HS<br>n=71   | ASD<br>n=79         | HS (TD)<br>n=105 |
| Age, mean (SD), year | 39.9 (8.2)      | 36.5 (8.5)   | 14.5 (7.0)          | 15.8 (6.3)       |
| Sex, Male/Female     | 58/13           | 50/21        | 68/11               | 79/26            |
| FIQ, mean (SD)       | 97.8 (16.8)     | 106.8 (11.2) | 107.9 (16.6)        | 113.2 (13.1)     |
| VIQ, mean (SD)       | 103.2 (16.3)    | 114.7 (11.6) | 105.8 (16.1)        | 113.1 (12.6)     |
| PIQ, mean (SD)       | 99.8 (16.9)     | 112.1 (11.6) | 108.8 (17.4)        | 110.1 (13.7)     |
| CPZE, mean (SD)      | 407.6 (1072.6)  |              |                     |                  |
| PANSS, mean (SD)     | 58.8 (13.8)     |              |                     |                  |
| ADOS, mean (SD)      |                 |              | 11.30 (4.1)         |                  |

---

546

547 Supplementary Table 1: Demographic and clinical information.

548

549

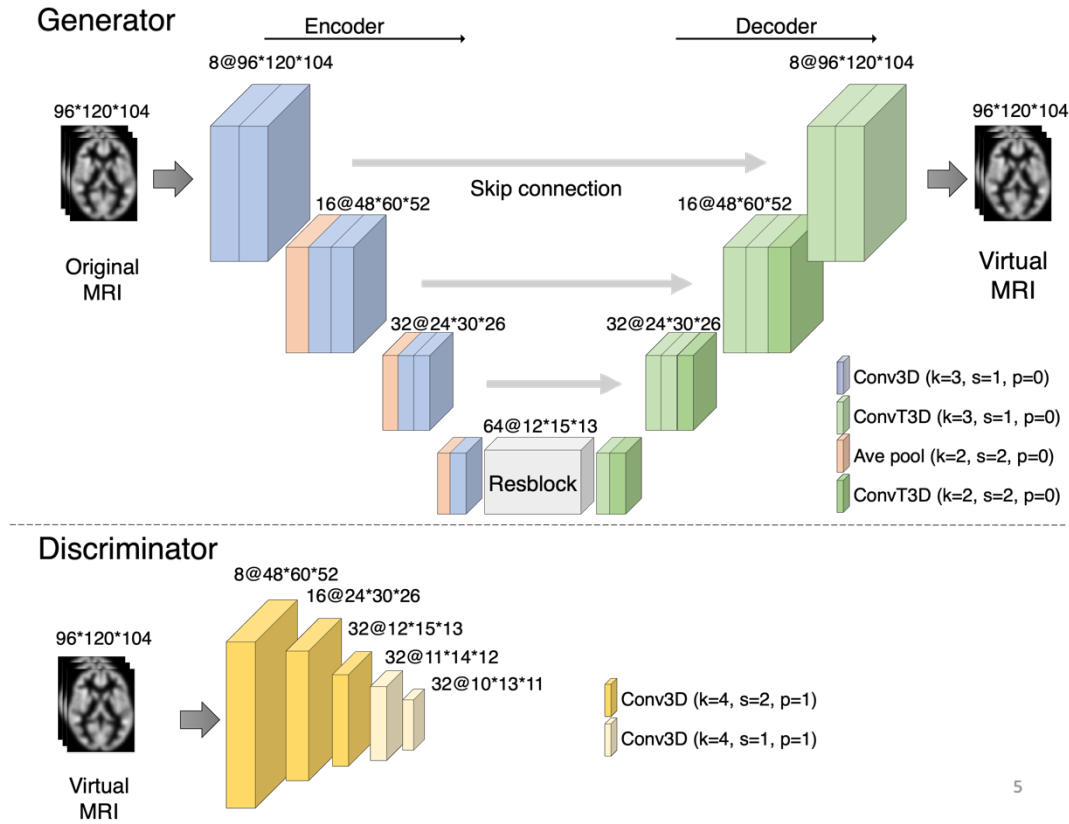

5

550  
551  
552  
553  
554  
555  
556  
557

Supplementary Figure 1: Our proposed CycleGAN architecture.

The numbers describe the number of channels and the size of the images. The generator consists of an encoder and a decoder, and the bottleneck contains a ResBlock. The encoder and decoder were designed as a U-Net with skip connections. The discriminator, a convolutional neural network, is trained to discriminate between the generated images and the ground truth.

558

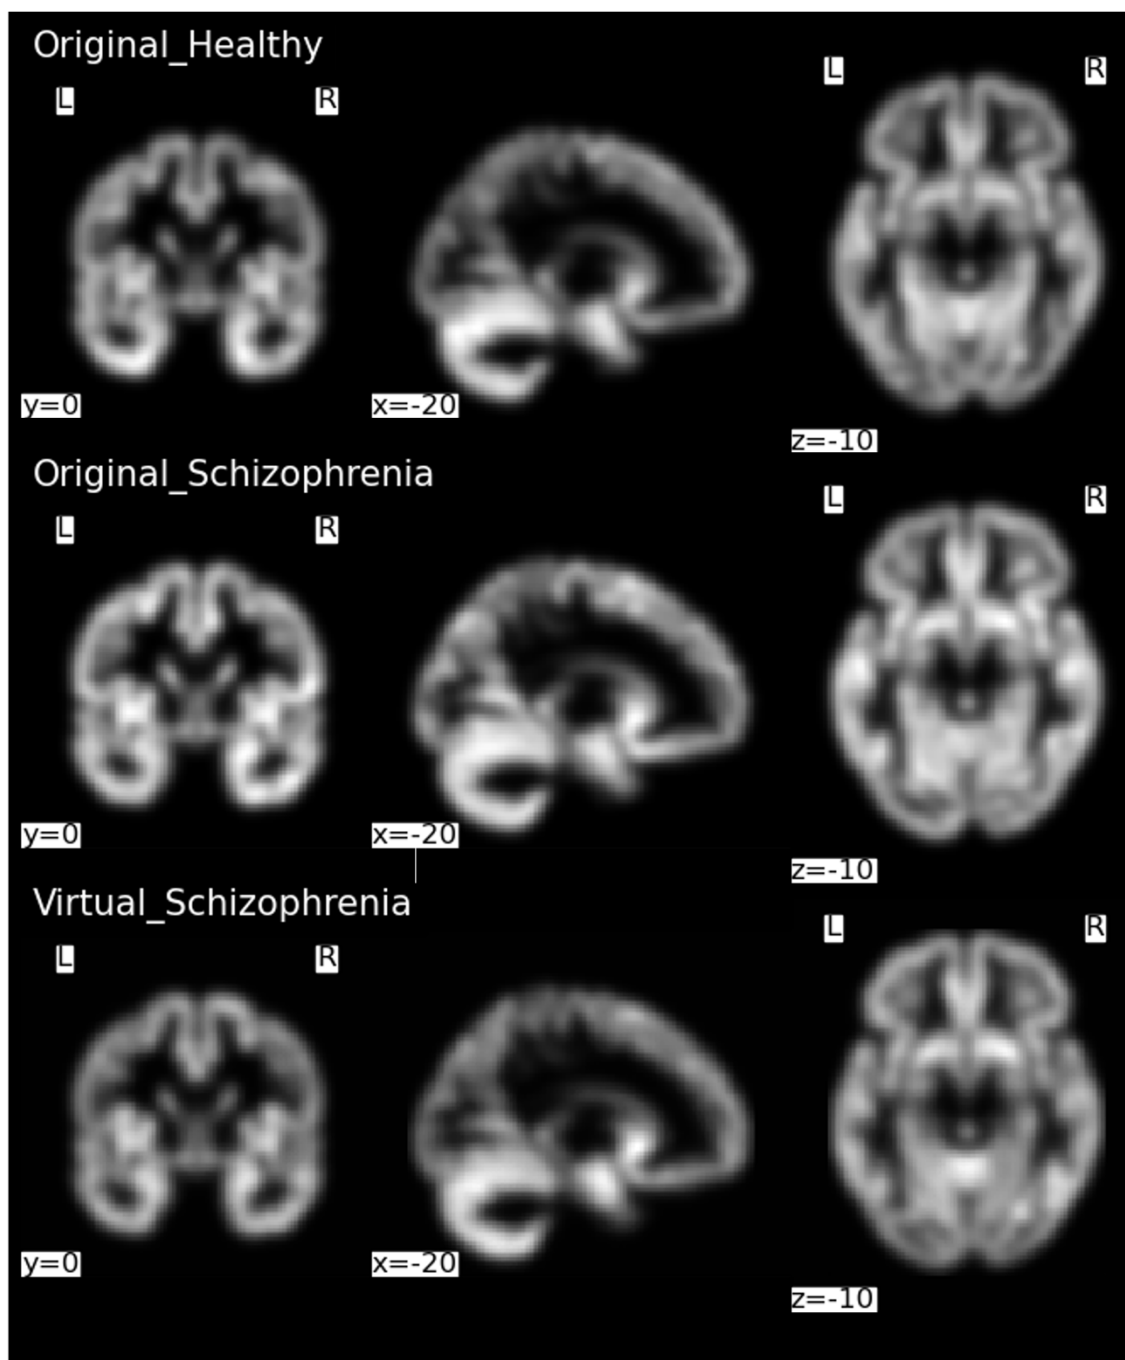

559

560 Supplementary Figure 2: Comparison of MRI images of healthy subjects, schizophrenia patients, and  
561 generated virtual schizophrenia MRI images.

562

563 MRI images of a healthy subject (top row), a real schizophrenia patient (middle row), and a virtual  
564 schizophrenia patient (bottom row). Coronal (left), sagittal (middle), and axial (right) views are  
565 shown, respectively. A virtual schizophrenia was generated from a healthy subject. It appears  
566 qualitatively no different from the real image.

567

568

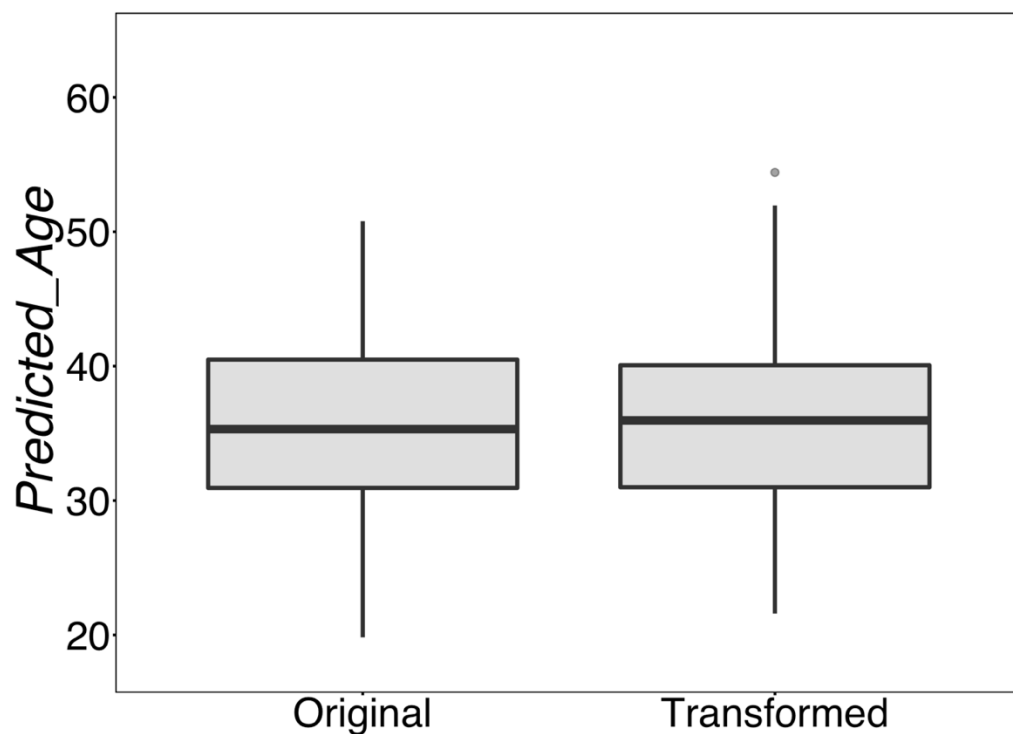

569

570 Supplementary Figure 3: Comparison of age predictions pre- and post-transformation

571

572 Healthy subject brain MRI was transformed to schizophrenia brain MRI and linear regression was  
573 performed for age predictions pre- and post-transformation, respectively. There were no significant  
574 differences in predictive values pre- and post-transformation.

575

576

577

578

579

580

581

582

583

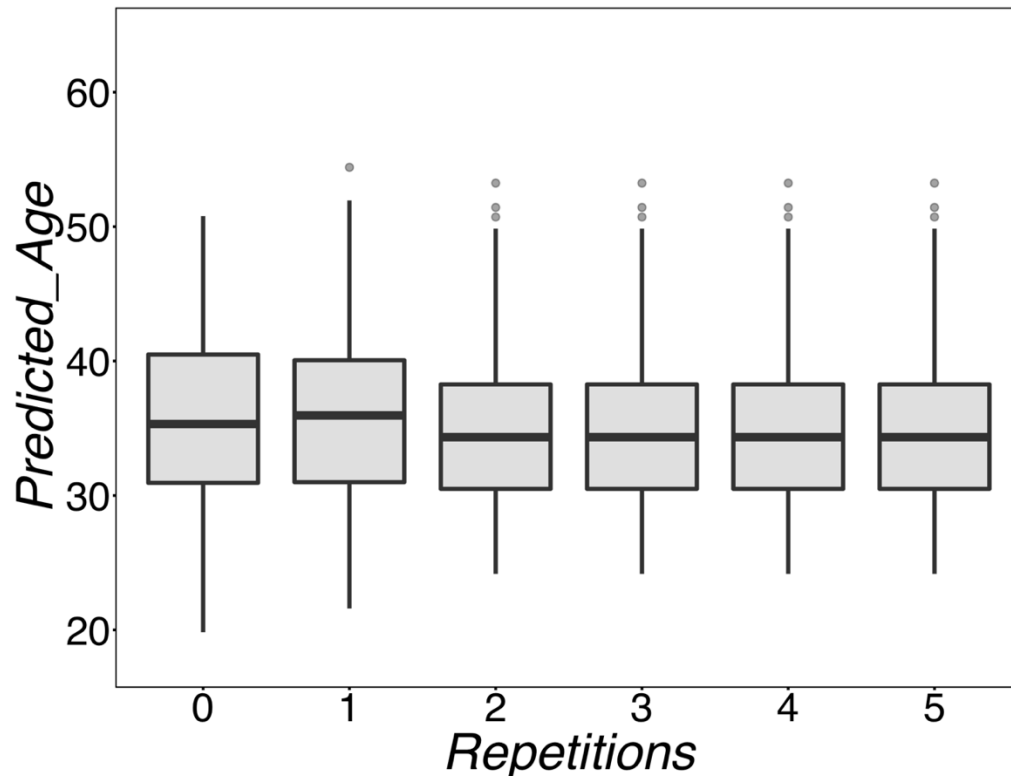

584

585 Supplementary Figure 4: Comparison of age prediction by repeatedly transformed brain images

586

587 Repeated transformation experiments were performed using the schizophrenia transformer. A linear  
588 regression was performed to predict age by each transformed image, and an ANOVA showed no  
589 significant difference in predicted values.

590

591

592
